# Supplementary material for: A Population Genetic Signal of Polygenic Adaptation
Source: PubMed Central journal article supplement (PMC4125079; doi:10.1371/journal.pgen.1004412), 2014-08-07
Supplement: pgen.1004412.s020.pdf [file pgen.1004412.s020.pdf]

| Population       | Genetic Height Score | Male Height (cm) | Female Height (cm) | Sex Averaged Height (cm) |
|------------------|----------------------|------------------|--------------------|--------------------------|
| BantuKenya       | -0.95                | 167.30           | 156.00             | 161.65                   |
| BantuSouthAfrica | -0.87                | 166.10           | 156.00             | 161.05                   |
| Basque           | -0.58                | 170.00           | 157.30             | 163.65                   |
| BiakaPygmy       | -0.95                | 152.70           | 145.00             | 148.85                   |
| Druze            | -0.63                | 165.60           | 152.20             | 158.90                   |
| French           | -0.31                | 169.60           | 160.40             | 165.00                   |
| Han              | -0.79                | 167.10           | 156.00             | 161.55                   |
| Italian          | -0.57                | 174.00           | 162.00             | 168.00                   |
| Maya             | -0.61                | 156.80           | 142.80             | 149.80                   |
| MbutiPygmy       | -1.08                | 144.19           | 137.35             | 140.77                   |
| Melanesian       | -0.60                | 162.10           | 150.40             | 156.25                   |
| Mongola          | -0.72                | 164.83           | 151.33             | 158.08                   |
| Orcadian         | -0.38                | 173.90           | 160.90             | 167.40                   |
| Papuan           | -0.59                | 155.97           | 149.41             | 152.69                   |
| Pima             | -0.84                | 171.00           | 157.00             | 164.00                   |
| Russian          | -0.46                | 171.80           | 159.80             | 165.80                   |
| San              | -0.98                | 157.70           | 146.60             | 152.15                   |
| Yoruba           | -0.85                | 167.50           | 155.00             | 161.25                   |
