# Supplementary material for: A Population Genetic Signal of Polygenic Adaptation
Source: PubMed Central journal article supplement (PMC4125079; doi:10.1371/journal.pgen.1004412), 2014-08-07
Supplement: pgen.1004412.s021.pdf [file pgen.1004412.s021.pdf]

| Population  | Genetic Pigmentation Score | Genetic Pigment Score w/ KITLG+OCA2 | Biasutti | Jablonski |
|-------------|----------------------------|-------------------------------------|----------|-----------|
| Adygei      | -0.09                      | 0.12                                | 12       |           |
| Balochi     | 0.14                       | 0.36                                | 12       |           |
| BantuKenya  | 1.21                       | 1.74                                | 0        | 32.40     |
| Basque      | -0.20                      | 0.02                                | 15       | 65.70     |
| Bedouin     | 0.07                       | 0.37                                | 10       |           |
| BiakaPygmy  | 1.22                       | 1.81                                | 0        |           |
| Brahui      | 0.06                       | 0.29                                | 12       |           |
| Burusho     | 0.15                       | 0.32                                | 12       |           |
| Cambodian   | 1.04                       | 1.22                                | 6        | 54.00     |
| Colombian   | 1.02                       | 1.24                                | 9        | 43.05     |
| Dai         | 1.04                       | 1.27                                | 12       |           |
| Daur        | 1.05                       | 1.30                                | 15       |           |
| Druze       | -0.10                      | 0.14                                | 10       | 53.00     |
| French      | -0.13                      | 0.12                                | 22       | 63.14     |
| Han         | 1.05                       | 1.19                                | 15       |           |
| Hazara      | 0.45                       | 0.69                                | 12       |           |
| Hezhen      | 0.99                       | 1.20                                | 15       |           |
| Italian     | -0.24                      | 0.05                                | 15       |           |
| Japanese    | 1.02                       | 1.09                                | 15       | 55.42     |
| Kalash      | 0.12                       | 0.33                                | 12       |           |
| Karitiana   | 1.05                       | 1.16                                | 9        | 47.70     |
| Lahu        | 1.01                       | 1.16                                | 12       | 59.17     |
| Makrani     | 0.22                       | 0.45                                | 12       |           |
| Mandenka    | 1.19                       | 1.78                                | 2        | 34.10     |
| Maya        | 0.99                       | 1.21                                | 9        |           |
| MbutiPygmy  | 1.20                       | 1.77                                | 0        |           |
| Melanesian  | 0.96                       | 1.31                                | 0        |           |
| Miao        | 1.04                       | 1.22                                | 15       |           |
| Mongola     | 1.06                       | 1.20                                | 15       |           |
| Mozabite    | 0.11                       | 0.42                                | 6        | 58.05     |
| Naxi        | 0.88                       | 1.01                                | 12       |           |
| Orcadian    | -0.17                      | 0.09                                | 22       | 66.10     |
| Oroqen      | 1.07                       | 1.23                                | 15       |           |
| Palestinian | -0.05                      | 0.21                                | 10       | 53.00     |
| Papuan      | 0.91                       | 1.06                                | 5        | 41.00     |
| Pathan      | 0.15                       | 0.38                                | 12       | 52.30     |
| Pima        | 0.99                       | 1.18                                | 6        |           |
| Russian     | -0.18                      | 0.09                                | 15       | 53.45     |
| San         | 0.81                       | 1.42                                | 0        | 43.75     |
| Sardinian   | -0.15                      | 0.09                                | 15       |           |
| She         | 1.13                       | 1.36                                | 15       |           |
| Sindhi      | 0.27                       | 0.51                                | 9        |           |
| Surui       | 1.08                       | 1.22                                | 9        |           |
| Tu          | 0.98                       | 1.15                                | 15       |           |
| Tujia       | 1.12                       | 1.28                                | 15       |           |
| Tuscan      | -0.29                      | 0.07                                | 15       |           |
| Uyгур       | 0.57                       | 0.84                                | 15       |           |
| Xibo        | 1.01                       | 1.17                                | 15       |           |
| Yakut       | 0.94                       | 1.20                                | 15       |           |
| Yi          | 0.99                       | 1.19                                | 15       |           |
| Yoruba      | 1.16                       | 1.76                                | 0        | 27.40     |
