# Supplementary material for: A Population Genetic Signal of Polygenic Adaptation
Source: PubMed Central journal article supplement (PMC4125079; doi:10.1371/journal.pgen.1004412), 2014-08-07
Supplement: pgen.1004412.s022.pdf [file pgen.1004412.s022.pdf]

|              | Observed | Expected | Variance | Z     | p               |
|--------------|----------|----------|----------|-------|-----------------|
| Europe       | -0.52    | -0.56    | 0.0030   | 0.58  | 0.563573        |
| Middle East  | -0.61    | -0.64    | 0.0025   | 0.50  | 0.620092        |
| Central Asia | -0.57    | -0.54    | 0.0025   | -0.65 | 0.514631        |
| East Asia    | -0.69    | -0.69    | 0.0068   | 0.01  | 0.990422        |
| Americas     | -0.71    | -0.61    | 0.0234   | -0.62 | 0.532068        |
| Oceania      | -0.59    | -0.65    | 0.0312   | 0.31  | 0.757571        |
| Africa       | -0.95    | -0.64    | 0.0238   | -2.00 | <b>0.045035</b> |
