# Supplementary material for: A Population Genetic Signal of Polygenic Adaptation
Source: PubMed Central journal article supplement (PMC4125079; doi:10.1371/journal.pgen.1004412), 2014-08-07
Supplement: pgen.1004412.s023.pdf [file pgen.1004412.s023.pdf]

|                  | Observed | Expected | Variance | Z     | p               |
|------------------|----------|----------|----------|-------|-----------------|
| Adygei           | -0.46    | -0.52    | 0.0058   | 0.81  | 0.420047        |
| Balochi          | -0.61    | -0.59    | 0.0039   | -0.34 | 0.732533        |
| BantuKenya       | -0.95    | -0.88    | 0.0074   | -0.89 | 0.370989        |
| BantuSouthAfrica | -0.87    | -0.93    | 0.0087   | 0.57  | 0.565944        |
| Basque           | -0.58    | -0.49    | 0.0058   | -1.14 | 0.253001        |
| Bedouin          | -0.67    | -0.60    | 0.0040   | -1.16 | 0.245140        |
| BiakaPygmy       | -0.95    | -0.92    | 0.0089   | -0.24 | 0.813609        |
| Brahui           | -0.66    | -0.59    | 0.0041   | -1.02 | 0.306021        |
| Burusho          | -0.65    | -0.54    | 0.0049   | -1.56 | 0.119344        |
| Cambodian        | -0.65    | -0.72    | 0.0075   | 0.81  | 0.419708        |
| Colombian        | -0.73    | -0.68    | 0.0149   | -0.37 | 0.712734        |
| Dai              | -0.70    | -0.72    | 0.0074   | 0.27  | 0.788165        |
| Daur             | -0.77    | -0.71    | 0.0068   | -0.73 | 0.466617        |
| Druze            | -0.63    | -0.57    | 0.0039   | -1.03 | 0.303758        |
| French           | -0.31    | -0.55    | 0.0032   | 4.19  | <b>0.000028</b> |
| Han              | -0.79    | -0.70    | 0.0018   | -2.16 | <b>0.030910</b> |
| Hazara           | -0.61    | -0.62    | 0.0040   | 0.09  | 0.932089        |
| Hezhen           | -0.63    | -0.70    | 0.0070   | 0.79  | 0.431967        |
| Italian          | -0.57    | -0.53    | 0.0067   | -0.45 | 0.653982        |
| Japanese         | -0.78    | -0.72    | 0.0036   | -0.99 | 0.320879        |
| Kalash           | -0.31    | -0.52    | 0.0110   | 1.92  | 0.054613        |
| Karitiana        | -0.78    | -0.65    | 0.0205   | -0.87 | 0.383564        |
| Lahu             | -0.85    | -0.70    | 0.0113   | -1.46 | 0.144720        |
| Makrani          | -0.65    | -0.60    | 0.0038   | -0.75 | 0.454499        |
| Mandenka         | -0.99    | -0.88    | 0.0058   | -1.45 | 0.146046        |
| Maya             | -0.61    | -0.70    | 0.0070   | 1.05  | 0.295347        |
| MbutiPygmy       | -1.08    | -0.95    | 0.0152   | -1.12 | 0.262901        |
| Melanesian       | -0.60    | -0.63    | 0.0199   | 0.24  | 0.810697        |
| Miao             | -0.65    | -0.72    | 0.0065   | 0.84  | 0.398726        |
| Mongola          | -0.72    | -0.69    | 0.0057   | -0.43 | 0.664301        |
| Mozabite         | -0.66    | -0.65    | 0.0071   | -0.06 | 0.952256        |
| Naxi             | -0.52    | -0.68    | 0.0088   | 1.67  | 0.095674        |
| Orcadian         | -0.38    | -0.48    | 0.0069   | 1.20  | 0.228890        |
| Oroqen           | -0.66    | -0.73    | 0.0075   | 0.85  | 0.397609        |
| Palestinian      | -0.50    | -0.65    | 0.0031   | 2.82  | <b>0.004789</b> |
| Papuan           | -0.59    | -0.59    | 0.0235   | 0.02  | 0.984319        |
| Pathan           | -0.45    | -0.57    | 0.0042   | 1.86  | 0.063140        |
| Pima             | -0.84    | -0.67    | 0.0152   | -1.42 | 0.156243        |
| Russian          | -0.46    | -0.47    | 0.0048   | 0.13  | 0.893316        |
| San              | -0.98    | -0.95    | 0.0278   | -0.16 | 0.873515        |
| Sardinian        | -0.79    | -0.51    | 0.0053   | -3.88 | <b>0.000105</b> |
| She              | -0.63    | -0.72    | 0.0073   | 1.03  | 0.303926        |
| Sindhi           | -0.62    | -0.57    | 0.0039   | -0.69 | 0.487958        |
| Surui            | -0.58    | -0.70    | 0.0253   | 0.78  | 0.433809        |
| Tu               | -0.65    | -0.69    | 0.0062   | 0.48  | 0.630360        |
| Tujia            | -0.69    | -0.72    | 0.0062   | 0.37  | 0.712043        |
| Tuscan           | -0.63    | -0.52    | 0.0113   | -1.00 | 0.318431        |
| Uygur            | -0.57    | -0.59    | 0.0074   | 0.19  | 0.847180        |
| Xibo             | -0.73    | -0.70    | 0.0068   | -0.30 | 0.760787        |
| Yakut            | -0.70    | -0.66    | 0.0059   | -0.49 | 0.626665        |
| Yi               | -0.57    | -0.71    | 0.0068   | 1.72  | 0.084613        |
| Yoruba           | -0.85    | -0.96    | 0.0048   | 1.59  | 0.111605        |
