# Supplementary material for: A Population Genetic Signal of Polygenic Adaptation
Source: PubMed Central journal article supplement (PMC4125079; doi:10.1371/journal.pgen.1004412), 2014-08-07
Supplement: pgen.1004412.s024.pdf [file pgen.1004412.s024.pdf]

|              | Observed | Expected | Variance | Z     | p               |
|--------------|----------|----------|----------|-------|-----------------|
| Europe       | -0.18    | -0.03    | 0.0030   | -2.75 | <b>0.005935</b> |
| Middle East  | 0.01     | 0.01     | 0.0030   | -0.14 | 0.889313        |
| Central Asia | 0.23     | 0.25     | 0.0027   | -0.24 | 0.813941        |
| East Asia    | 1.02     | 0.82     | 0.0086   | 2.15  | <b>0.031684</b> |
| Americas     | 1.03     | 0.68     | 0.0333   | 1.91  | 0.056218        |
| Oceania      | 0.93     | 0.80     | 0.0392   | 0.68  | 0.493996        |
| Africa       | 1.13     | 0.63     | 0.0506   | 2.21  | <b>0.027041</b> |
