# Supplementary material for: A Population Genetic Signal of Polygenic Adaptation
Source: PubMed Central journal article supplement (PMC4125079; doi:10.1371/journal.pgen.1004412), 2014-08-07
Supplement: pgen.1004412.s025.pdf [file pgen.1004412.s025.pdf]

|                  | Observed | Exptected | Variance | Z     | p        |
|------------------|----------|-----------|----------|-------|----------|
| Adygei           | -0.09    | -0.04     | 0.0062   | -0.64 | 0.525090 |
| Balochi          | 0.14     | 0.13      | 0.0046   | 0.20  | 0.838807 |
| BantuKenya       | 1.21     | 1.08      | 0.0128   | 1.16  | 0.247685 |
| BantuSouthAfrica | 1.13     | 1.17      | 0.0144   | -0.32 | 0.746846 |
| Basque           | -0.20    | -0.17     | 0.0063   | -0.38 | 0.704915 |
| Bedouin          | 0.07     | -0.05     | 0.0049   | 1.74  | 0.081934 |
| BiakaPygmy       | 1.22     | 1.11      | 0.0143   | 0.93  | 0.350280 |
| Brahui           | 0.06     | 0.13      | 0.0050   | -0.98 | 0.326220 |
| Burusho          | 0.15     | 0.26      | 0.0057   | -1.53 | 0.125199 |
| Cambodian        | 1.04     | 0.92      | 0.0096   | 1.16  | 0.244370 |
| Colombian        | 1.02     | 1.10      | 0.0188   | -0.59 | 0.553594 |
| Dai              | 1.04     | 1.04      | 0.0100   | 0.04  | 0.965427 |
| Daur             | 1.05     | 0.99      | 0.0091   | 0.61  | 0.543435 |
| Druze            | -0.10    | -0.09     | 0.0045   | -0.20 | 0.844204 |
| French           | -0.13    | -0.20     | 0.0039   | 1.22  | 0.222146 |
| Han              | 1.05     | 1.06      | 0.0026   | -0.33 | 0.744919 |
| Hazara           | 0.45     | 0.49      | 0.0052   | -0.64 | 0.519429 |
| Hezhen           | 0.99     | 1.05      | 0.0100   | -0.64 | 0.519743 |
| Italian          | -0.24    | -0.12     | 0.0082   | -1.26 | 0.207688 |
| Japanese         | 1.02     | 1.06      | 0.0048   | -0.54 | 0.586193 |
| Kalash           | 0.12     | 0.09      | 0.0134   | 0.21  | 0.833512 |
| Karitiana        | 1.05     | 1.07      | 0.0254   | -0.10 | 0.919046 |
| Lahu             | 1.02     | 1.03      | 0.0143   | -0.09 | 0.924466 |
| Makrani          | 0.22     | 0.14      | 0.0049   | 1.17  | 0.240751 |
| Mandenka         | 1.19     | 1.12      | 0.0102   | 0.64  | 0.525346 |
| Maya             | 0.99     | 0.85      | 0.0088   | 1.43  | 0.151325 |
| MbutiPygmy       | 1.20     | 1.12      | 0.0252   | 0.50  | 0.616103 |
| Melanesian       | 0.96     | 0.87      | 0.0284   | 0.51  | 0.611448 |
| Miao             | 1.04     | 1.06      | 0.0087   | -0.25 | 0.803925 |
| Mongola          | 1.06     | 0.96      | 0.0079   | 1.17  | 0.240282 |
| Mozabite         | 0.11     | 0.19      | 0.0096   | -0.81 | 0.416292 |
| Naxi             | 0.88     | 1.02      | 0.0112   | -1.32 | 0.185939 |
| Orcadian         | -0.17    | -0.12     | 0.0078   | -0.60 | 0.548105 |
| Oroqen           | 1.07     | 1.02      | 0.0098   | 0.49  | 0.626438 |
| Palestinian      | -0.05    | 0.02      | 0.0036   | -1.16 | 0.247433 |
| Papuan           | 0.91     | 0.89      | 0.0326   | 0.10  | 0.919411 |
| Pathan           | 0.15     | 0.16      | 0.0048   | -0.11 | 0.911081 |
| Pima             | 0.99     | 0.97      | 0.0200   | 0.10  | 0.923266 |
| Russian          | -0.18    | -0.05     | 0.0053   | -1.89 | 0.058819 |
| San              | 0.81     | 1.07      | 0.0405   | -1.31 | 0.191477 |
| Sardinian        | -0.15    | -0.20     | 0.0062   | 0.55  | 0.583092 |
| She              | 1.13     | 1.04      | 0.0095   | 0.94  | 0.345316 |
| Sindhi           | 0.27     | 0.22      | 0.0052   | 0.67  | 0.501326 |
| Surui            | 1.08     | 0.99      | 0.0365   | 0.45  | 0.652715 |
| Tu               | 0.98     | 0.99      | 0.0086   | -0.12 | 0.905437 |
| Tujia            | 1.12     | 1.07      | 0.0083   | 0.54  | 0.585802 |
| Tuscan           | -0.29    | -0.13     | 0.0128   | -1.36 | 0.174556 |
| Uygur            | 0.57     | 0.50      | 0.0085   | 0.73  | 0.465493 |
| Xibo             | 1.01     | 0.96      | 0.0086   | 0.56  | 0.577734 |
| Yakut            | 0.94     | 0.86      | 0.0078   | 0.88  | 0.377402 |
| Yi               | 0.99     | 1.02      | 0.0087   | -0.32 | 0.745359 |
| Yoruba           | 1.16     | 1.23      | 0.0086   | -0.66 | 0.508211 |
