# Supplementary material for: A Population Genetic Signal of Polygenic Adaptation
Source: PubMed Central journal article supplement (PMC4125079; doi:10.1371/journal.pgen.1004412), 2014-08-07
Supplement: pgen.1004412.s026.pdf [file pgen.1004412.s026.pdf]

|              | Observed | Expected | Variance | Z     | p               |
|--------------|----------|----------|----------|-------|-----------------|
| Europe       | -2.10    | -2.10    | 0.0092   | -0.02 | 0.986166        |
| Middle East  | -2.14    | -2.17    | 0.0080   | 0.41  | 0.683249        |
| Central Asia | -2.19    | -2.24    | 0.0077   | 0.63  | 0.528510        |
| East Asia    | -2.62    | -2.24    | 0.0224   | -2.53 | <b>0.011480</b> |
| Americas     | -2.29    | -2.35    | 0.0788   | 0.21  | 0.832973        |
| Oceania      | -2.36    | -2.51    | 0.1036   | 0.48  | 0.632885        |
| Africa       | -2.47    | -2.37    | 0.0826   | -0.33 | 0.742233        |
