# Supplementary material for: A Population Genetic Signal of Polygenic Adaptation
Source: PubMed Central journal article supplement (PMC4125079; doi:10.1371/journal.pgen.1004412), 2014-08-07
Supplement: pgen.1004412.s027.pdf [file pgen.1004412.s027.pdf]

|                  | Observed | Expected | Variance | Z     | p               |
|------------------|----------|----------|----------|-------|-----------------|
| Adygei           | -2.25    | -2.09    | 0.0193   | -1.13 | 0.259383        |
| Balochi          | -2.28    | -2.26    | 0.0124   | -0.12 | 0.906459        |
| BantuKenya       | -2.34    | -2.45    | 0.0252   | 0.71  | 0.475069        |
| BantuSouthAfrica | -2.49    | -2.43    | 0.0297   | -0.35 | 0.724172        |
| Basque           | -2.29    | -2.07    | 0.0182   | -1.59 | 0.110893        |
| Bedouin          | -2.19    | -2.11    | 0.0128   | -0.68 | 0.493665        |
| BiakaPygmy       | -2.47    | -2.47    | 0.0290   | -0.05 | 0.959030        |
| Brahui           | -2.29    | -2.22    | 0.0143   | -0.55 | 0.582714        |
| Burusho          | -2.34    | -2.18    | 0.0147   | -1.33 | 0.183764        |
| Cambodian        | -2.77    | -2.73    | 0.0247   | -0.27 | 0.788781        |
| Colombian        | -1.77    | -2.44    | 0.0498   | 2.98  | <b>0.002842</b> |
| Dai              | -2.82    | -2.73    | 0.0248   | -0.60 | 0.545319        |
| Daur             | -2.49    | -2.51    | 0.0237   | 0.11  | 0.913165        |
| Druze            | -2.09    | -2.15    | 0.0128   | 0.58  | 0.561551        |
| French           | -2.07    | -2.09    | 0.0104   | 0.20  | 0.844786        |
| Han              | -2.65    | -2.65    | 0.0061   | 0.06  | 0.951026        |
| Hazara           | -2.20    | -2.32    | 0.0124   | 1.04  | 0.300183        |
| Hezhen           | -2.68    | -2.47    | 0.0241   | -1.39 | 0.165463        |
| Italian          | -2.24    | -2.09    | 0.0220   | -1.06 | 0.287855        |
| Japanese         | -2.43    | -2.59    | 0.0118   | 1.49  | 0.137107        |
| Kalash           | -1.75    | -2.19    | 0.0364   | 2.28  | <b>0.022595</b> |
| Karitiana        | -2.43    | -2.37    | 0.0680   | -0.25 | 0.801202        |
| Lahu             | -3.04    | -2.68    | 0.0378   | -1.86 | 0.063279        |
| Makrani          | -2.37    | -2.21    | 0.0122   | -1.46 | 0.143943        |
| Mandenka         | -2.36    | -2.44    | 0.0193   | 0.61  | 0.540442        |
| Maya             | -2.36    | -2.20    | 0.0224   | -1.12 | 0.264309        |
| MbutiPygmy       | -2.50    | -2.49    | 0.0536   | -0.07 | 0.947811        |
| Melanesian       | -2.25    | -2.44    | 0.0676   | 0.74  | 0.459264        |
| Miao             | -2.75    | -2.69    | 0.0218   | -0.40 | 0.689780        |
| Mongola          | -2.69    | -2.43    | 0.0192   | -1.92 | 0.054866        |
| Mozabite         | -2.23    | -2.15    | 0.0247   | -0.49 | 0.625131        |
| Naxi             | -2.44    | -2.70    | 0.0288   | 1.56  | 0.119884        |
| Orcadian         | -2.12    | -2.07    | 0.0215   | -0.37 | 0.709254        |
| Oroqen           | -2.31    | -2.50    | 0.0241   | 1.18  | 0.237730        |
| Palestinian      | -2.04    | -2.16    | 0.0097   | 1.13  | 0.258466        |
| Papuan           | -2.46    | -2.37    | 0.0791   | -0.33 | 0.743669        |
| Pathan           | -2.14    | -2.21    | 0.0135   | 0.64  | 0.523054        |
| Pima             | -2.54    | -2.30    | 0.0489   | -1.10 | 0.271635        |
| Russian          | -1.84    | -2.13    | 0.0151   | 2.37  | <b>0.017852</b> |
| San              | -2.65    | -2.47    | 0.0894   | -0.62 | 0.535534        |
| Sardinian        | -2.10    | -2.12    | 0.0166   | 0.11  | 0.910561        |
| She              | -2.94    | -2.70    | 0.0245   | -1.54 | 0.123110        |
| Sindhi           | -2.22    | -2.25    | 0.0135   | 0.33  | 0.741178        |
| Surui            | -2.33    | -2.26    | 0.0834   | -0.24 | 0.808288        |
| Tu               | -2.64    | -2.57    | 0.0206   | -0.52 | 0.604447        |
| Tujia            | -2.61    | -2.63    | 0.0201   | 0.16  | 0.875686        |
| Tuscan           | -1.93    | -2.13    | 0.0355   | 1.10  | 0.273049        |
| Uygur            | -2.11    | -2.34    | 0.0228   | 1.54  | 0.124610        |
| Xibo             | -2.20    | -2.50    | 0.0212   | 2.07  | <b>0.038059</b> |
| Yakut            | -2.27    | -2.32    | 0.0192   | 0.40  | 0.690521        |
| Yi               | -2.84    | -2.59    | 0.0219   | -1.73 | 0.082850        |
| Yoruba           | -2.46    | -2.38    | 0.0170   | -0.61 | 0.541470        |
