# Supplementary material for: A Population Genetic Signal of Polygenic Adaptation
Source: PubMed Central journal article supplement (PMC4125079; doi:10.1371/journal.pgen.1004412), 2014-08-07
Supplement: pgen.1004412.s028.pdf [file pgen.1004412.s028.pdf]

|              | Observed | Expected | Variance | Z     | p               |
|--------------|----------|----------|----------|-------|-----------------|
| Europe       | 0.72     | 1.00     | 0.0097   | -2.79 | <b>0.005315</b> |
| Middle East  | 1.02     | 0.81     | 0.0079   | 2.37  | <b>0.017671</b> |
| Central Asia | 0.92     | 0.88     | 0.0078   | 0.53  | 0.598600        |
| East Asia    | 0.81     | 0.98     | 0.0216   | -1.16 | 0.244114        |
| Americas     | 0.85     | 0.79     | 0.0773   | 0.21  | 0.831384        |
| Oceania      | 1.00     | 0.96     | 0.1013   | 0.11  | 0.912009        |
| Africa       | 1.08     | 1.11     | 0.0813   | -0.10 | 0.918661        |
