# Supplementary material for: A Population Genetic Signal of Polygenic Adaptation
Source: PubMed Central journal article supplement (PMC4125079; doi:10.1371/journal.pgen.1004412), 2014-08-07
Supplement: pgen.1004412.s029.pdf [file pgen.1004412.s029.pdf]

|                  | Observed | Expected | Variance | Z     | p               |
|------------------|----------|----------|----------|-------|-----------------|
| Adygei           | 0.84     | 0.88     | 0.0185   | -0.30 | 0.763788        |
| Balochi          | 0.81     | 0.93     | 0.0126   | -1.02 | 0.306287        |
| BantuKenya       | 1.21     | 1.05     | 0.0262   | 1.00  | 0.318499        |
| BantuSouthAfrica | 1.04     | 1.09     | 0.0300   | -0.28 | 0.780539        |
| Basque           | 0.76     | 0.72     | 0.0190   | 0.28  | 0.777993        |
| Bedouin          | 0.94     | 0.99     | 0.0131   | -0.39 | 0.694506        |
| BiakaPygmy       | 0.94     | 1.09     | 0.0299   | -0.82 | 0.409850        |
| Brahui           | 0.89     | 0.92     | 0.0135   | -0.27 | 0.784720        |
| Burusho          | 0.91     | 0.93     | 0.0163   | -0.16 | 0.875229        |
| Cambodian        | 0.89     | 0.86     | 0.0254   | 0.22  | 0.829257        |
| Colombian        | 1.03     | 0.88     | 0.0499   | 0.68  | 0.499559        |
| Dai              | 0.89     | 0.82     | 0.0245   | 0.42  | 0.678026        |
| Daur             | 0.72     | 0.79     | 0.0227   | -0.49 | 0.627610        |
| Druze            | 1.02     | 0.90     | 0.0130   | 1.06  | 0.291242        |
| French           | 0.66     | 0.79     | 0.0110   | -1.24 | 0.213762        |
| Han              | 0.78     | 0.83     | 0.0063   | -0.68 | 0.494587        |
| Hazara           | 0.89     | 0.86     | 0.0134   | 0.25  | 0.799840        |
| Hezhen           | 0.98     | 0.77     | 0.0256   | 1.37  | 0.172155        |
| Italian          | 0.72     | 0.79     | 0.0223   | -0.51 | 0.610084        |
| Japanese         | 0.74     | 0.81     | 0.0124   | -0.66 | 0.509728        |
| Kalash           | 0.87     | 0.94     | 0.0380   | -0.31 | 0.753570        |
| Karitiana        | 0.66     | 0.87     | 0.0681   | -0.81 | 0.419843        |
| Lahu             | 0.81     | 0.83     | 0.0383   | -0.11 | 0.909731        |
| Makrani          | 0.76     | 0.94     | 0.0125   | -1.66 | 0.097230        |
| Mandenka         | 1.00     | 1.11     | 0.0203   | -0.80 | 0.425733        |
| Maya             | 0.98     | 0.90     | 0.0230   | 0.51  | 0.609012        |
| MbutiPygmy       | 1.04     | 1.03     | 0.0518   | 0.04  | 0.971663        |
| Melanesian       | 1.15     | 0.83     | 0.0695   | 1.24  | 0.215185        |
| Miao             | 0.95     | 0.80     | 0.0225   | 0.99  | 0.322573        |
| Mongola          | 0.74     | 0.79     | 0.0197   | -0.42 | 0.676445        |
| Mozabite         | 1.07     | 0.91     | 0.0239   | 1.08  | 0.279820        |
| Naxi             | 0.94     | 0.80     | 0.0284   | 0.79  | 0.431243        |
| Orcadian         | 0.80     | 0.73     | 0.0219   | 0.45  | 0.655908        |
| Oroqen           | 0.82     | 0.79     | 0.0239   | 0.24  | 0.812587        |
| Palestinian      | 1.05     | 0.89     | 0.0101   | 1.60  | 0.110698        |
| Papuan           | 0.84     | 1.16     | 0.0802   | -1.13 | 0.260430        |
| Pathan           | 1.09     | 0.89     | 0.0138   | 1.74  | 0.081439        |
| Pima             | 1.25     | 0.88     | 0.0543   | 1.57  | 0.116103        |
| Russian          | 0.70     | 0.76     | 0.0158   | -0.52 | 0.601197        |
| San              | 1.21     | 0.98     | 0.0869   | 0.79  | 0.432263        |
| Sardinian        | 0.69     | 0.82     | 0.0174   | -0.99 | 0.322545        |
| She              | 0.68     | 0.81     | 0.0246   | -0.83 | 0.408294        |
| Sindhi           | 1.10     | 0.92     | 0.0133   | 1.59  | 0.112277        |
| Surui            | 0.36     | 0.95     | 0.0870   | -2.01 | <b>0.044245</b> |
| Tu               | 0.80     | 0.78     | 0.0216   | 0.15  | 0.877641        |
| Tujia            | 0.88     | 0.81     | 0.0200   | 0.46  | 0.642326        |
| Tuscan           | 0.63     | 0.85     | 0.0362   | -1.11 | 0.265107        |
| Uygur            | 0.99     | 0.84     | 0.0236   | 1.00  | 0.318441        |
| Xibo             | 0.76     | 0.80     | 0.0223   | -0.30 | 0.765435        |
| Yakut            | 0.67     | 0.83     | 0.0208   | -1.12 | 0.263127        |
| Yi               | 0.75     | 0.83     | 0.0221   | -0.56 | 0.573343        |
| Yoruba           | 1.13     | 1.08     | 0.0168   | 0.33  | 0.740815        |
