# Supplementary material for: A Population Genetic Signal of Polygenic Adaptation
Source: PubMed Central journal article supplement (PMC4125079; doi:10.1371/journal.pgen.1004412), 2014-08-07
Supplement: pgen.1004412.s030.pdf [file pgen.1004412.s030.pdf]

|              | Observed | Expected | Variance | Z     | p               |
|--------------|----------|----------|----------|-------|-----------------|
| Europe       | 0.58     | 0.75     | 0.0188   | -1.22 | 0.220764        |
| Middle East  | 0.59     | 0.62     | 0.0166   | -0.30 | 0.763396        |
| Central Asia | 0.82     | 0.55     | 0.0151   | 2.21  | <b>0.027100</b> |
| East Asia    | 0.53     | 0.94     | 0.0459   | -1.90 | 0.056975        |
| Americas     | 0.71     | 0.67     | 0.1529   | 0.09  | 0.925298        |
| Oceania      | 0.34     | 0.59     | 0.1959   | -0.55 | 0.581088        |
| Africa       | 0.20     | 0.52     | 0.1535   | -0.83 | 0.409211        |
