# Supplementary material for: A Population Genetic Signal of Polygenic Adaptation
Source: PubMed Central journal article supplement (PMC4125079; doi:10.1371/journal.pgen.1004412), 2014-08-07
Supplement: pgen.1004412.s031.pdf [file pgen.1004412.s031.pdf]

|                  | Observed | Expected | Variance | Z     | p               |
|------------------|----------|----------|----------|-------|-----------------|
| Adygei           | 0.52     | 0.69     | 0.0378   | -0.89 | 0.370810        |
| Balochi          | 0.83     | 0.79     | 0.0236   | 0.22  | 0.823291        |
| BantuKenya       | -0.09    | 0.20     | 0.0485   | -1.31 | 0.191212        |
| BantuSouthAfrica | 0.08     | 0.21     | 0.0566   | -0.56 | 0.575256        |
| Basque           | 0.73     | 0.57     | 0.0381   | 0.80  | 0.423331        |
| Bedouin          | 0.63     | 0.62     | 0.0254   | 0.05  | 0.963091        |
| BiakaPygmy       | 0.15     | 0.28     | 0.0574   | -0.54 | 0.587432        |
| Brahui           | 0.96     | 0.80     | 0.0273   | 0.97  | 0.332305        |
| Burusho          | 0.63     | 0.74     | 0.0315   | -0.61 | 0.538809        |
| Cambodian        | 0.34     | 0.51     | 0.0500   | -0.72 | 0.470030        |
| Colombian        | 0.61     | 0.76     | 0.0986   | -0.46 | 0.647213        |
| Dai              | 0.49     | 0.46     | 0.0475   | 0.14  | 0.892361        |
| Daur             | 0.53     | 0.63     | 0.0457   | -0.47 | 0.637409        |
| Druze            | 0.55     | 0.68     | 0.0254   | -0.79 | 0.430724        |
| French           | 0.37     | 0.67     | 0.0219   | -2.04 | <b>0.041575</b> |
| Han              | 0.53     | 0.52     | 0.0123   | 0.05  | 0.957247        |
| Hazara           | 0.82     | 0.68     | 0.0266   | 0.84  | 0.401314        |
| Hezhen           | 0.61     | 0.58     | 0.0494   | 0.16  | 0.870215        |
| Italian          | 0.33     | 0.65     | 0.0436   | -1.51 | 0.132112        |
| Japanese         | 0.44     | 0.59     | 0.0239   | -0.94 | 0.349319        |
| Kalash           | 0.50     | 0.76     | 0.0726   | -0.97 | 0.332454        |
| Karitiana        | 0.59     | 0.77     | 0.1389   | -0.50 | 0.615762        |
| Lahu             | 0.71     | 0.42     | 0.0765   | 1.02  | 0.305499        |
| Makrani          | 0.83     | 0.77     | 0.0247   | 0.34  | 0.734710        |
| Mandenka         | 0.18     | 0.11     | 0.0374   | 0.39  | 0.696885        |
| Maya             | 0.78     | 0.64     | 0.0442   | 0.67  | 0.505123        |
| MbutiPygmy       | 0.37     | 0.19     | 0.1039   | 0.56  | 0.572635        |
| Melanesian       | 0.55     | 0.39     | 0.1321   | 0.44  | 0.656722        |
| Miao             | 0.30     | 0.50     | 0.0450   | -0.95 | 0.341732        |
| Mongola          | 0.94     | 0.59     | 0.0392   | 1.73  | 0.082971        |
| Mozabite         | 0.47     | 0.55     | 0.0468   | -0.36 | 0.719113        |
| Naxi             | 0.36     | 0.48     | 0.0548   | -0.48 | 0.627989        |
| Orcadian         | 0.51     | 0.62     | 0.0459   | -0.51 | 0.609310        |
| Oroqen           | 0.53     | 0.62     | 0.0500   | -0.43 | 0.664401        |
| Palestinian      | 0.69     | 0.60     | 0.0197   | 0.60  | 0.546529        |
| Papuan           | 0.13     | 0.50     | 0.1611   | -0.91 | 0.364157        |
| Pathan           | 0.68     | 0.82     | 0.0275   | -0.79 | 0.426714        |
| Pima             | 0.63     | 0.73     | 0.0996   | -0.33 | 0.743225        |
| Russian          | 0.73     | 0.56     | 0.0319   | 0.96  | 0.338325        |
| San              | 0.51     | 0.19     | 0.1691   | 0.79  | 0.431902        |
| Sardinian        | 0.79     | 0.52     | 0.0342   | 1.44  | 0.150713        |
| She              | 0.68     | 0.49     | 0.0498   | 0.86  | 0.391621        |
| Sindhi           | 0.96     | 0.72     | 0.0254   | 1.47  | 0.142144        |
| Surui            | 0.95     | 0.72     | 0.1718   | 0.54  | 0.586772        |
| Tu               | 0.30     | 0.53     | 0.0432   | -1.12 | 0.263329        |
| Tujia            | 0.28     | 0.54     | 0.0411   | -1.27 | 0.204893        |
| Tuscan           | 0.68     | 0.62     | 0.0724   | 0.23  | 0.817115        |
| Uygur            | 1.21     | 0.66     | 0.0466   | 2.57  | <b>0.010253</b> |
| Xibo             | 1.02     | 0.59     | 0.0458   | 2.01  | <b>0.044766</b> |
| Yakut            | 0.59     | 0.68     | 0.0401   | -0.43 | 0.664595        |
| Yi               | 0.41     | 0.53     | 0.0413   | -0.56 | 0.577533        |
| Yoruba           | 0.17     | 0.10     | 0.0329   | 0.39  | 0.695121        |
