# Supplementary material for: A Population Genetic Signal of Polygenic Adaptation
Source: PubMed Central journal article supplement (PMC4125079; doi:10.1371/journal.pgen.1004412), 2014-08-07
Supplement: pgen.1004412.s032.pdf [file pgen.1004412.s032.pdf]

|              | Observed | Expected | Variance | Z     | p               |
|--------------|----------|----------|----------|-------|-----------------|
| Europe       | 0.30     | 0.55     | 0.0144   | -2.08 | <b>0.037863</b> |
| Middle East  | 0.43     | 0.40     | 0.0127   | 0.23  | 0.817361        |
| Central Asia | 0.67     | 0.47     | 0.0123   | 1.74  | 0.081000        |
| East Asia    | 0.51     | 0.91     | 0.0343   | -2.12 | <b>0.033839</b> |
| Americas     | 0.43     | 0.58     | 0.1149   | -0.43 | 0.667025        |
| Oceania      | 0.95     | 0.55     | 0.1560   | 1.03  | 0.305336        |
| Africa       | 0.33     | 0.55     | 0.1229   | -0.62 | 0.532409        |
