# Supplementary material for: A Population Genetic Signal of Polygenic Adaptation
Source: PubMed Central journal article supplement (PMC4125079; doi:10.1371/journal.pgen.1004412), 2014-08-07
Supplement: pgen.1004412.s033.pdf [file pgen.1004412.s033.pdf]

|                  | Observed | Expected | Variance | Z     | p               |
|------------------|----------|----------|----------|-------|-----------------|
| Adygei           | 0.40     | 0.52     | 0.0287   | -0.75 | 0.454405        |
| Balochi          | 0.77     | 0.65     | 0.0192   | 0.80  | 0.425065        |
| BantuKenya       | 0.17     | 0.26     | 0.0381   | -0.44 | 0.658187        |
| BantuSouthAfrica | 0.10     | 0.31     | 0.0459   | -1.00 | 0.315538        |
| Basque           | 0.28     | 0.36     | 0.0281   | -0.44 | 0.658278        |
| Bedouin          | 0.51     | 0.43     | 0.0203   | 0.58  | 0.561443        |
| BiakaPygmy       | 0.33     | 0.37     | 0.0435   | -0.19 | 0.850748        |
| Brahui           | 0.69     | 0.70     | 0.0212   | -0.04 | 0.966201        |
| Burusho          | 0.68     | 0.61     | 0.0246   | 0.46  | 0.644084        |
| Cambodian        | 0.55     | 0.47     | 0.0400   | 0.37  | 0.711734        |
| Colombian        | 0.35     | 0.50     | 0.0769   | -0.56 | 0.573665        |
| Dai              | 0.50     | 0.46     | 0.0380   | 0.24  | 0.813796        |
| Daur             | 0.45     | 0.59     | 0.0377   | -0.69 | 0.492558        |
| Druze            | 0.43     | 0.47     | 0.0196   | -0.31 | 0.756796        |
| French           | 0.29     | 0.38     | 0.0166   | -0.63 | 0.527907        |
| Han              | 0.32     | 0.53     | 0.0096   | -2.13 | <b>0.033117</b> |
| Hazara           | 0.74     | 0.56     | 0.0210   | 1.26  | 0.207136        |
| Hezhen           | 0.75     | 0.47     | 0.0372   | 1.44  | 0.150826        |
| Italian          | 0.21     | 0.36     | 0.0347   | -0.79 | 0.431323        |
| Japanese         | 0.45     | 0.51     | 0.0192   | -0.46 | 0.642099        |
| Kalash           | 0.26     | 0.62     | 0.0563   | -1.52 | 0.127606        |
| Karitiana        | 0.39     | 0.41     | 0.1076   | -0.06 | 0.953921        |
| Lahu             | 0.63     | 0.44     | 0.0600   | 0.77  | 0.441513        |
| Makrani          | 0.72     | 0.64     | 0.0194   | 0.57  | 0.566336        |
| Mandenka         | 0.18     | 0.25     | 0.0296   | -0.37 | 0.714488        |
| Maya             | 0.52     | 0.43     | 0.0360   | 0.46  | 0.646610        |
| MbutiPygmy       | 0.62     | 0.40     | 0.0816   | 0.78  | 0.437484        |
| Melanesian       | 1.14     | 0.68     | 0.1018   | 1.44  | 0.150504        |
| Miao             | 0.35     | 0.49     | 0.0351   | -0.73 | 0.465745        |
| Mongola          | 0.69     | 0.51     | 0.0305   | 1.01  | 0.314222        |
| Mozabite         | 0.20     | 0.39     | 0.0368   | -0.98 | 0.329376        |
| Naxi             | 0.44     | 0.51     | 0.0445   | -0.30 | 0.762696        |
| Orcadian         | -0.00    | 0.39     | 0.0351   | -2.12 | <b>0.034016</b> |
| Oroqen           | 0.57     | 0.56     | 0.0373   | 0.06  | 0.950027        |
| Palestinian      | 0.56     | 0.46     | 0.0148   | 0.84  | 0.399894        |
| Papuan           | 0.76     | 0.96     | 0.1195   | -0.55 | 0.579229        |
| Pathan           | 0.37     | 0.68     | 0.0204   | -2.15 | <b>0.031576</b> |
| Pima             | 0.49     | 0.50     | 0.0803   | -0.04 | 0.971033        |
| Russian          | 0.61     | 0.31     | 0.0235   | 1.94  | 0.052946        |
| San              | 0.70     | 0.40     | 0.1256   | 0.85  | 0.393139        |
| Sardinian        | 0.42     | 0.29     | 0.0282   | 0.76  | 0.449837        |
| She              | 0.52     | 0.46     | 0.0400   | 0.31  | 0.753611        |
| Sindhi           | 0.86     | 0.59     | 0.0199   | 1.93  | 0.053454        |
| Surui            | 0.42     | 0.53     | 0.1337   | -0.29 | 0.770331        |
| Tu               | 0.38     | 0.48     | 0.0328   | -0.56 | 0.574730        |
| Tujia            | 0.51     | 0.43     | 0.0324   | 0.46  | 0.649040        |
| Tuscan           | 0.16     | 0.45     | 0.0582   | -1.17 | 0.240321        |
| Uygur            | 0.91     | 0.53     | 0.0358   | 2.00  | <b>0.045954</b> |
| Xibo             | 0.68     | 0.49     | 0.0343   | 0.99  | 0.323788        |
| Yakut            | 0.49     | 0.62     | 0.0319   | -0.74 | 0.461639        |
| Yi               | 0.46     | 0.47     | 0.0335   | -0.05 | 0.957944        |
| Yoruba           | 0.23     | 0.17     | 0.0250   | 0.37  | 0.708225        |
