# Supplementary material for: A Population Genetic Signal of Polygenic Adaptation
Source: PubMed Central journal article supplement (PMC4125079; doi:10.1371/journal.pgen.1004412), 2014-08-07
Supplement: pgen.1004412.s034.pdf [file pgen.1004412.s034.pdf]

| Phenotype          | SUMPC1             | SUMPC2               | WINPC1       | WINPC2              | Latitude             |
|--------------------|--------------------|----------------------|--------------|---------------------|----------------------|
| Height             | -0.22 (0.11)       | 0.003 (0.93)         | -0.12 (0.37) | <b>0.38 (0.008)</b> | 0.12 (0.34)          |
| Skin Pigmentation  | <b>0.31(0.025)</b> | 0.07 (0.62)          | 0.27 (0.061) | -0.11 (0.38)        | <b>-0.36 (0.009)</b> |
| Body Mass Index    | -0.22 (0.15)       | 0.04 (0.74)          | -0.17 (0.29) | 0.24 (0.11)         | 0.21 (0.21)          |
| Type 2 Diabetes    | 0.10 (0.36)        | 0.10 (0.42)          | 0.14 (0.25)  | -0.07 (0.56)        | -0.20 (0.093)        |
| Crohn's Disease    | 0.25 (0.066)       | <b>-0.30 (0.033)</b> | 0.01 (0.86)  | -0.28 (0.053)       | 0.08 (0.61)          |
| Ulcerative Colitis | 0.17 (0.22)        | <b>-0.29 (0.046)</b> | 0.06 (0.61)  | -0.21 (0.15)        | -0.11(0.40)          |
