# Supplementary material for: A Population Genetic Signal of Polygenic Adaptation
Source: PubMed Central journal article supplement (PMC4125079; doi:10.1371/journal.pgen.1004412), 2014-08-07
Supplement: pgen.1004412.s035.pdf [file pgen.1004412.s035.pdf]

| Phenotype          | SUMPC1             | SUMPC2               | WINPC1       | WINPC2              | Latitude      |
|--------------------|--------------------|----------------------|--------------|---------------------|---------------|
| Height             | -0.15 (0.24)       | -0.006 (0.89)        | -0.13 (0.31) | <b>0.32 (0.025)</b> | 0.10 (0.42)   |
| Skin Pigmentation  | <b>0.28(0.045)</b> | 0.008 (0.98)         | 0.24 (0.097) | -0.11 (0.40)        | -0.25 (0.087) |
| Body Mass Index    | -0.24 (0.12)       | 0.07 (0.57)          | -0.11 (0.57) | 0.25 (0.097)        | 0.14 (0.47)   |
| Type 2 Diabetes    | 0.12 (0.30)        | 0.11 (0.34)          | 0.09 (0.39)  | -0.07 (0.56)        | -0.21 (0.08)  |
| Crohn's Disease    | 0.21 (0.12)        | <b>-0.29 (0.039)</b> | 0.01 (0.86)  | -0.22 (0.12)        | 0.08 (0.63)   |
| Ulcerative Colitis | 0.19 (0.17)        | -0.23 (0.12)         | 0.18 (0.65)  | -0.15 (0.30)        | -0.17(0.20)   |
